# Supplementary material for: Human HLA-A*02:01/CHM1+ allo-restricted T cell receptor transgenic CD8+ T Cells specifically inhibit Ewing sarcoma growth in vitro and in vivo
Source: PubMed Central journal article supplement (PMC5190022; doi:10.18632/oncotarget.9218), 2016-05-07
Supplement: oncotarget-07-43267-s001.pdf [file oncotarget-07-43267-s001.pdf]

## Human HLA-A\*02:01/CHM1<sup>+</sup> allo-restricted T cell receptor transgenic CD8<sup>+</sup> T Cells specifically inhibit Ewing sarcoma growth *in vitro* and *in vivo*

### SUPPLEMENTARY FIGURES AND TABLE

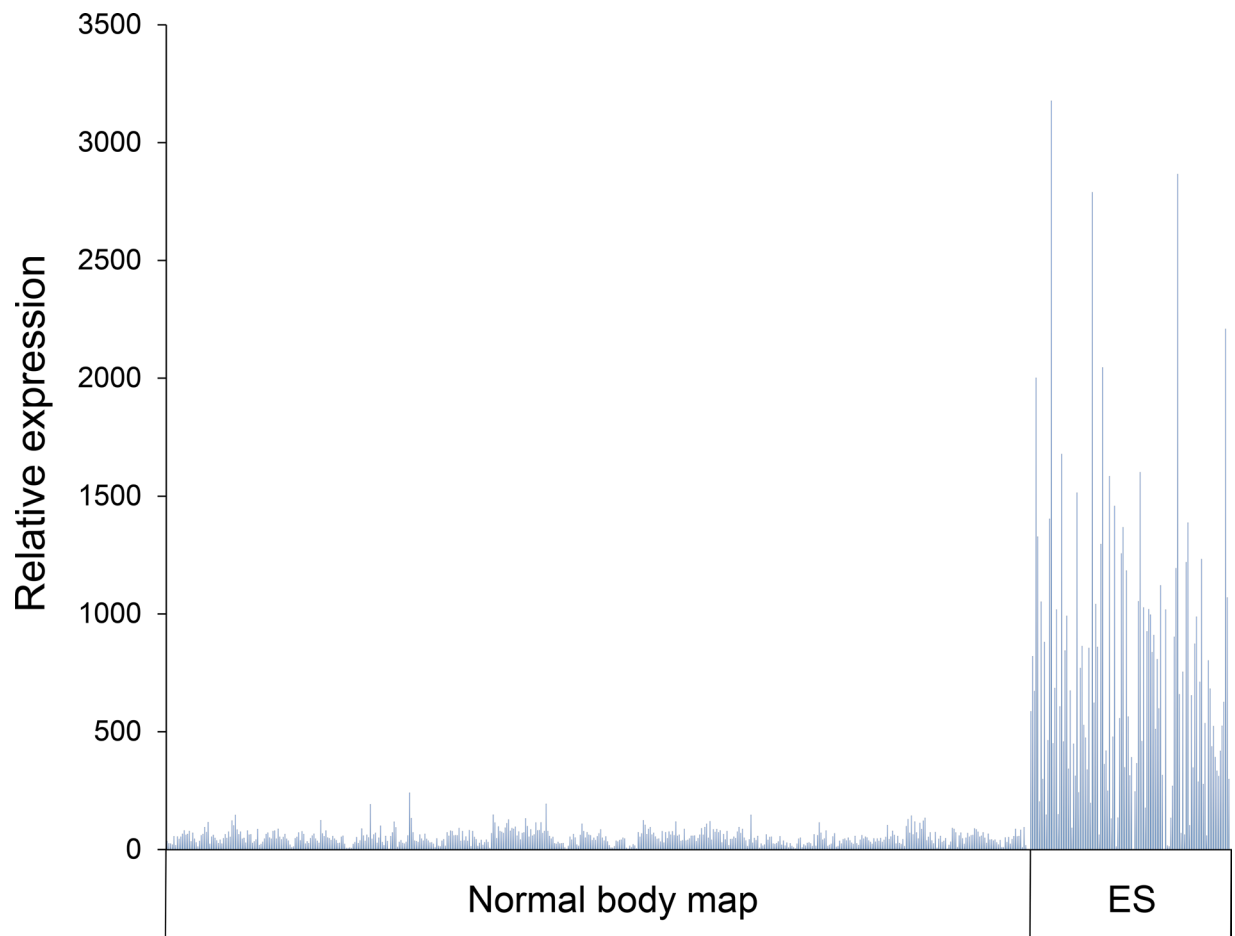

**Supplementary Figure S1: CHM1 Expression in ES versus normal body map.** Relative gene expression levels of CHM1 in healthy tissue samples (Normal Body Map, left panel; n=504) compared to primary ES samples (ES, right panel; n=117,) [32]. Data were retrieved from the R2: microarray analysis and visualization platform (<http://r2.amc.nl>).

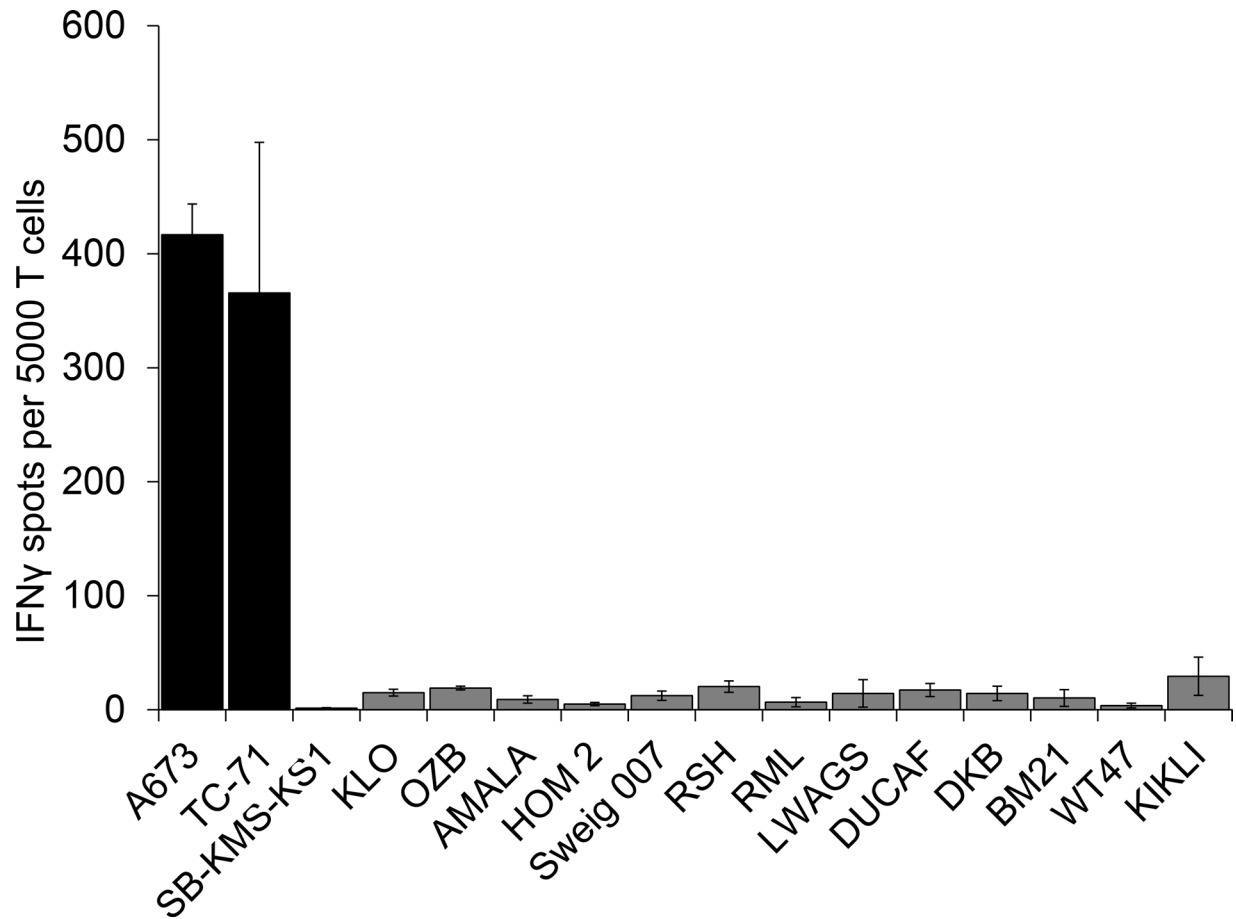

**Supplementary Figure S2: No Cross-reactivity of CHM1<sup>319</sup>-TCR-transgenic CD8<sup>+</sup> T cells.** LCL covering the most common HLA antigens of the HLA-A2 superfamily were used as target cells for CHM1<sup>319</sup>-TCR-transgenic CD8<sup>+</sup> T cells at an effector-target ratio of 1:4. Error bars indicate standard deviation of tested triplicates. HLA-A\*02:01<sup>+</sup> ES cell lines A673 and TC-71, and the HLA-A\*02:01<sup>-</sup> ES cell line SB-KMS-KS1 were used as positive and negative controls.

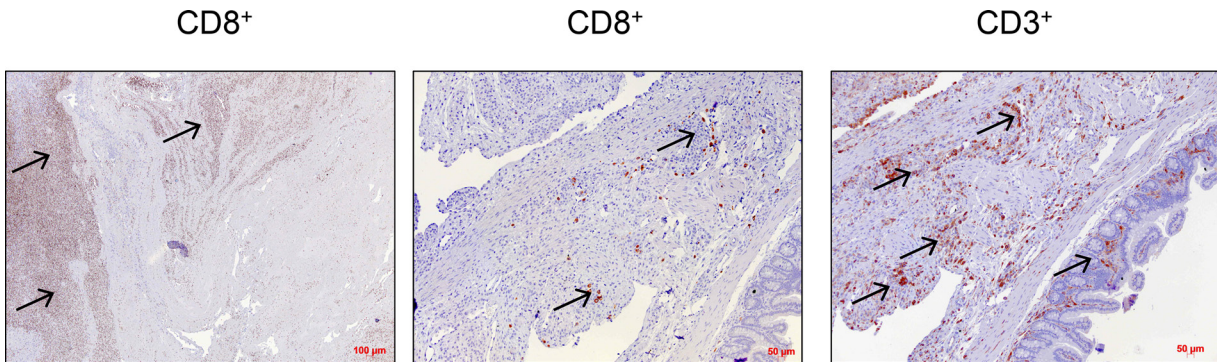

**Supplementary Figure S3: Adoptive transfer of unspecific T cells cause gastric GvHD.** Immunohistochemical staining reveals swollen gastric walls and mesenteric tissue in the presence of a strong invasion of CD3<sup>+</sup> T cells containing a sub-population of CD8<sup>+</sup> T cells (arrows) of exemplary mouse #13 (study group) ten days after i.v. adoptive transfer of  $1 \times 10^7$  unspecific PBMC (control group 2) in line with the presence of GvHD.

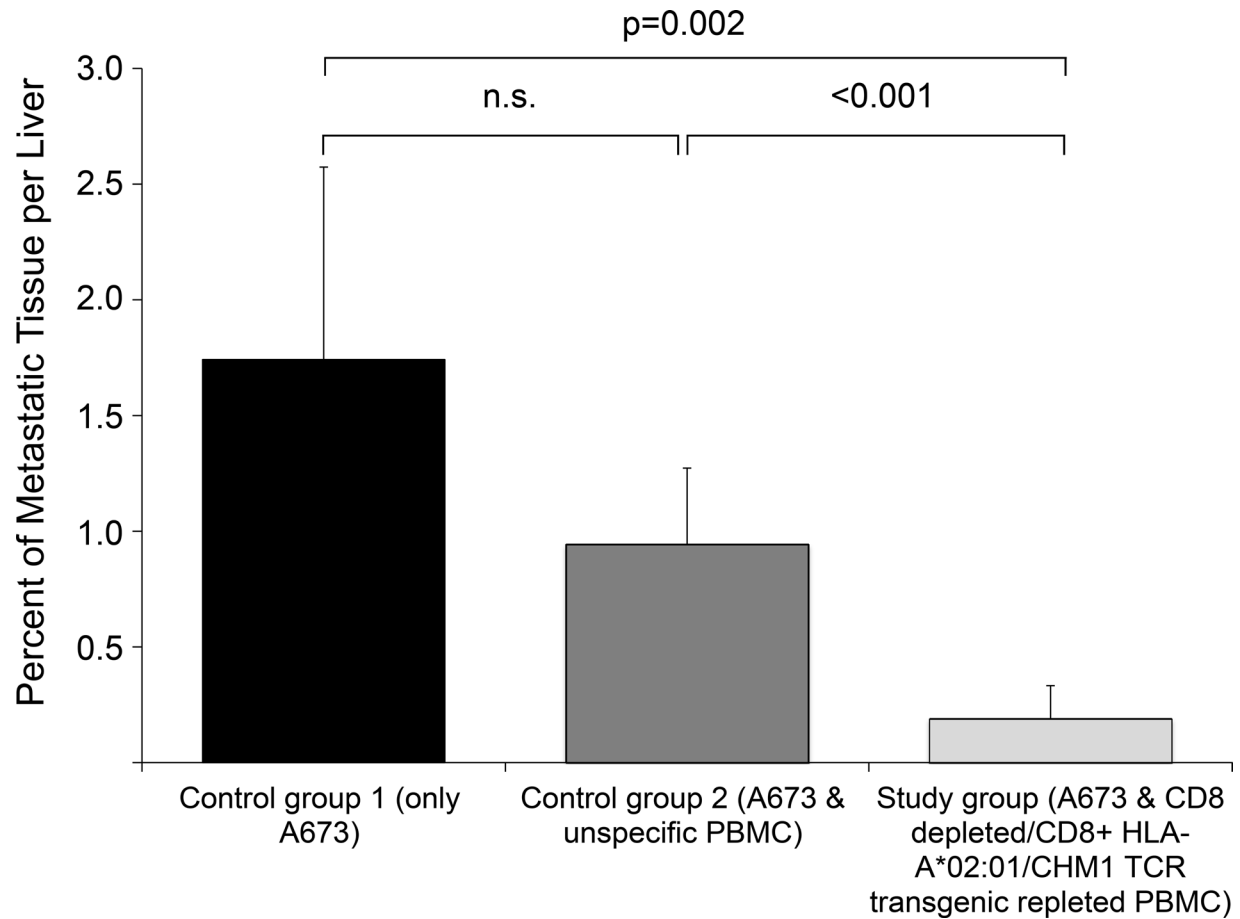

**Supplementary Figure S4: Ewing sarcoma burden is proven significantly lower in representative study group mice versus controls.** Histologically calculated mean tumor areas in relation to respective organ areas of sectioned livers of three representative mice per group. Only the differences between control group 1 and control group 2 mice versus study group mice were statistically significant ( $p < 0.05$ ).

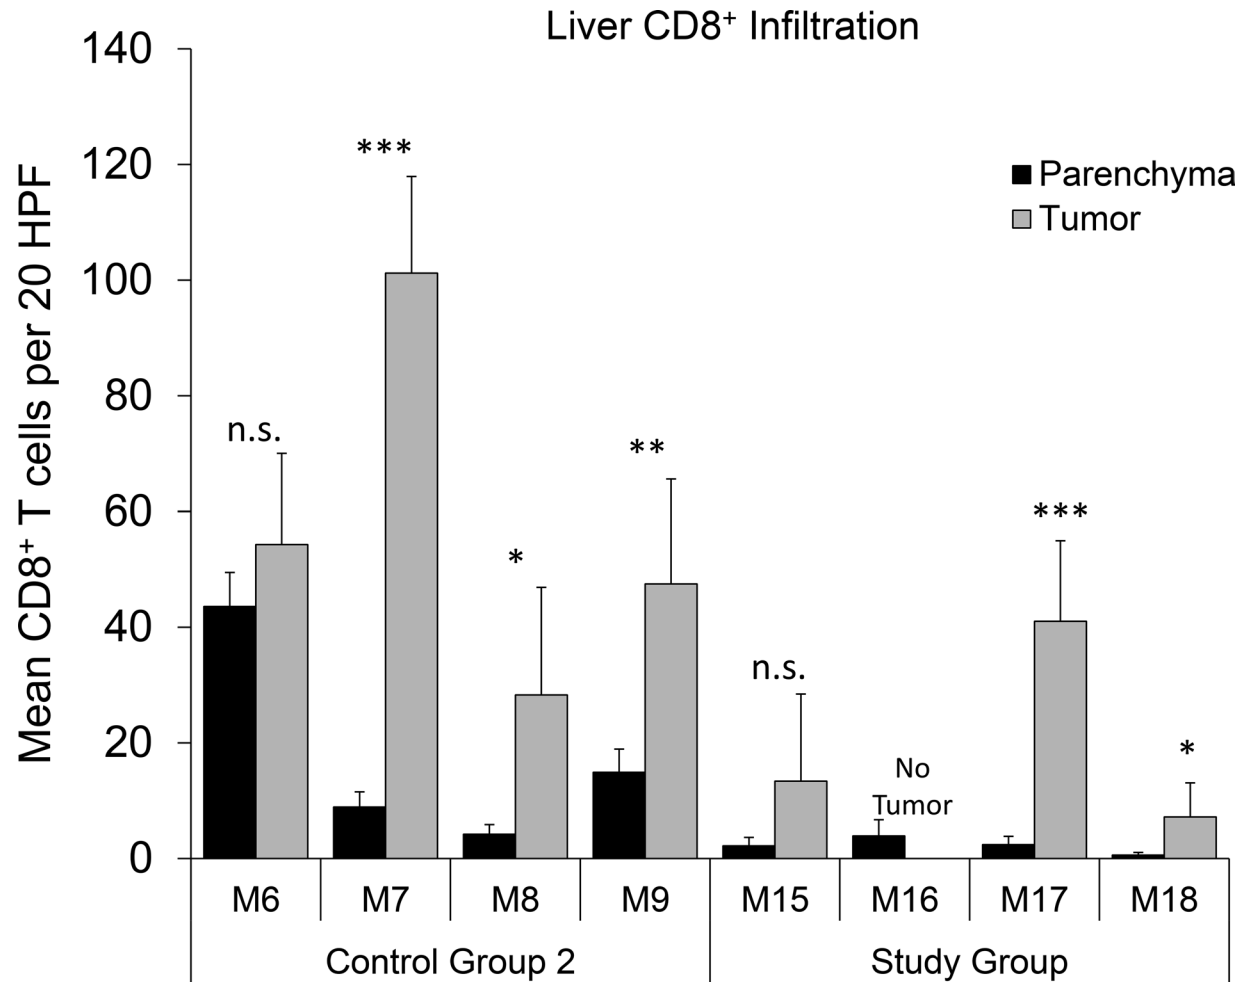

**Supplementary Figure S5: CD8<sup>+</sup> T cell home to Ewing sarcoma lesions in 5 out of 7 representative mice.** Five out of seven representative control group 2 and study group mice show significantly higher CD8<sup>+</sup> T cell infiltration in the proximity of tumor lesions (as calculated by CD8<sup>+</sup> T cells per 40x magnification defined high power field (HPF) (study group mouse #16 showed no tumor tissue in the liver). *p* values < 0.05 were considered statistically significant (\**p* < 0.05; \*\**p* < 0.005; \*\*\**p* < 0.0005).

**Supplementary Table S1: CHM1 TCR sequences. A. Unmodified sequence of the variable part of the  $\alpha$ -chain TRAV13-1\*02; B. Unmodified sequence of the variable part of the  $\beta$ -chain TRAV13\*01; C. Murinized and optimized sequence of the insert used for construction of pMP71\_CHM1\_mu\_opt.**

See Supplementary File1
